# Supplementary material
Source: Springer Nature journal article supplement (https://www.springermedizin.de/resource/supplementary/13256_2012_2578_MOESM1_ESM.pdf/9649986)

5

Hernia sac

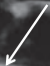

6

Supplement: MOESM1 [file 9649986]
